# Supplementary material for: Synergistic Action of Benzyl Isothiocyanate and Sorafenib in a Nanoparticle Delivery System for Enhanced Triple-Negative Breast Cancer Treatment
Source: MDPI journal article supplement (doi:10.3390/cancers16091695), 2024-04-26
Supplement: s1 [file s1]

## Supplementary information:

### Synergistic Action of Benzyl Isothiocyanate and Sorafenib in a Nanoparticle Delivery System for Enhanced Triple-Negative Breast Cancer Treatment

Qi Wang<sup>1\*</sup>†, Nan Cheng<sup>1†</sup>, Wei Wang<sup>1</sup>, Yongping Bao<sup>1\*</sup>

<sup>1</sup> Norwich Medical school, University of East Anglia, NR4 7UQ, United Kingdom

\* Correspondence: QW: [q.wang1@uea.ac.uk](mailto:q.wang1@uea.ac.uk), YPB: [y.bao@uea.ac.uk](mailto:y.bao@uea.ac.uk)

† These two authors contributed equally to this work

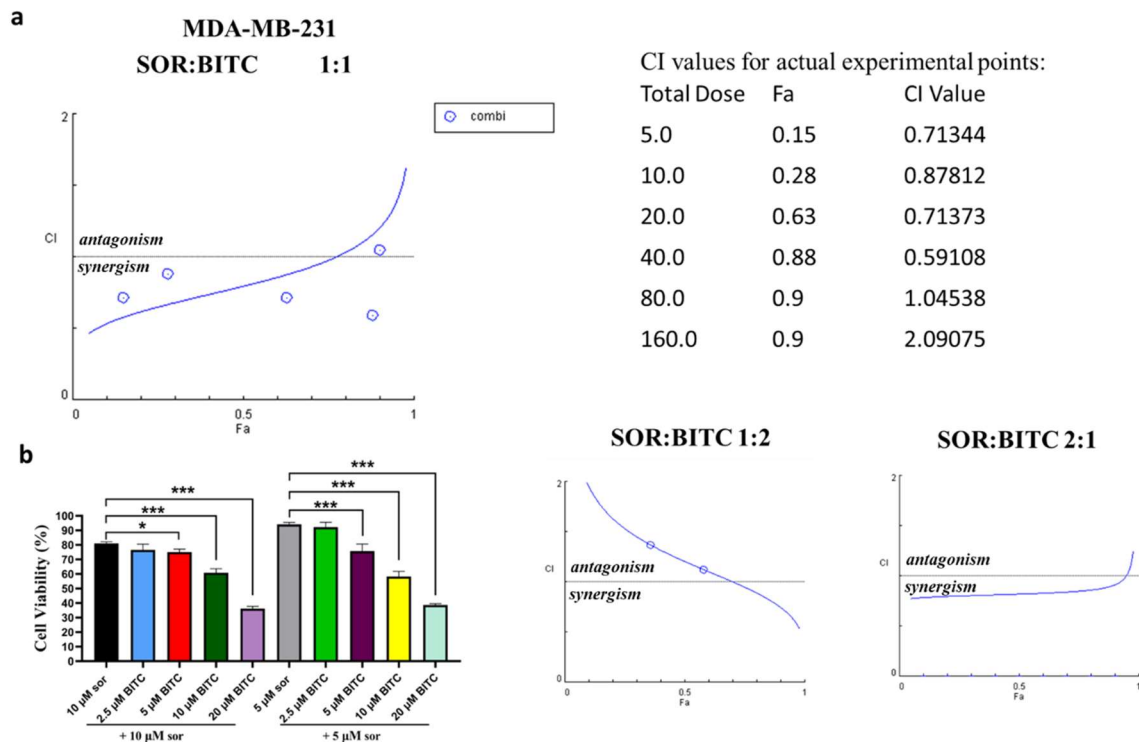

Figure S1. Chou-Talalay's Combinational Index (CI) was calculated using cell viability assay value in MDA-MB-231 cells treated with BITC and SOR combinations. (a) Combination Index Plot of BITC and SOR combination treatment. (Total Dose: dose of BITC plus dose of SOR; Fa: average effect values; CI value: combinational index value. CI values for synergism is 0-1, and for antagonism is 1- $\infty$ ) (b) Cell viability of MDA-MB-231 cells was measured using MTT assays 24 hours after BITC and SOR treatment.



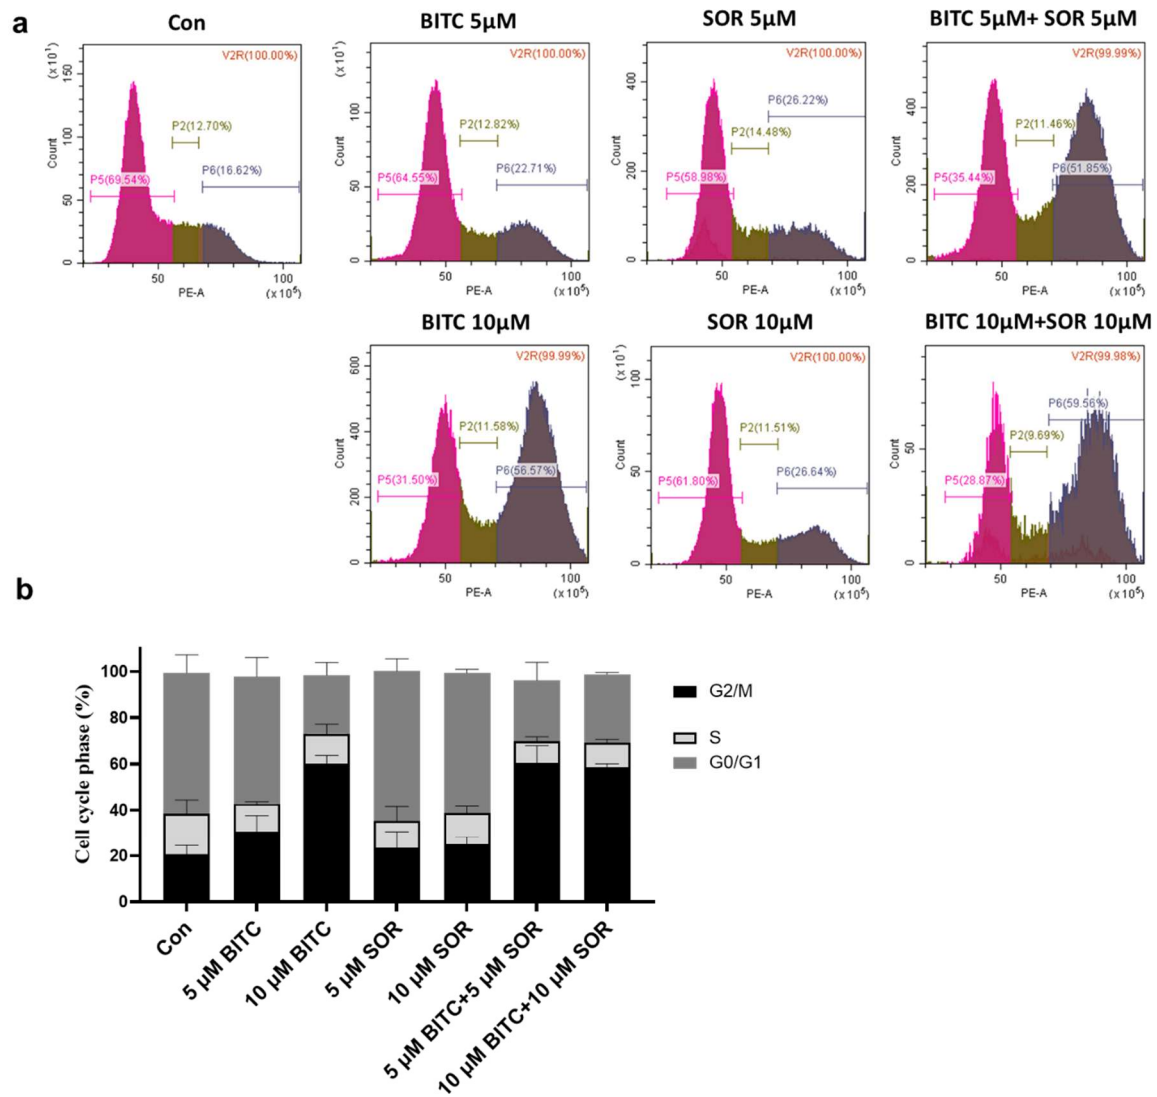

Figure S3. Effects of BITC and SOR combined treatment on MCF-7 cell cycle. (a) Flow cytometry analysis of the cell cycle distribution after 24 hours of treatment with BITC and/or SOR. (b) Quantitative evaluation of cells arrested at G2. Data are presented as means  $\pm$  SD ( $n = 3$ ). \* $P < 0.05$ , \*\* $P < 0.01$ , \*\*\* $P < 0.001$ .

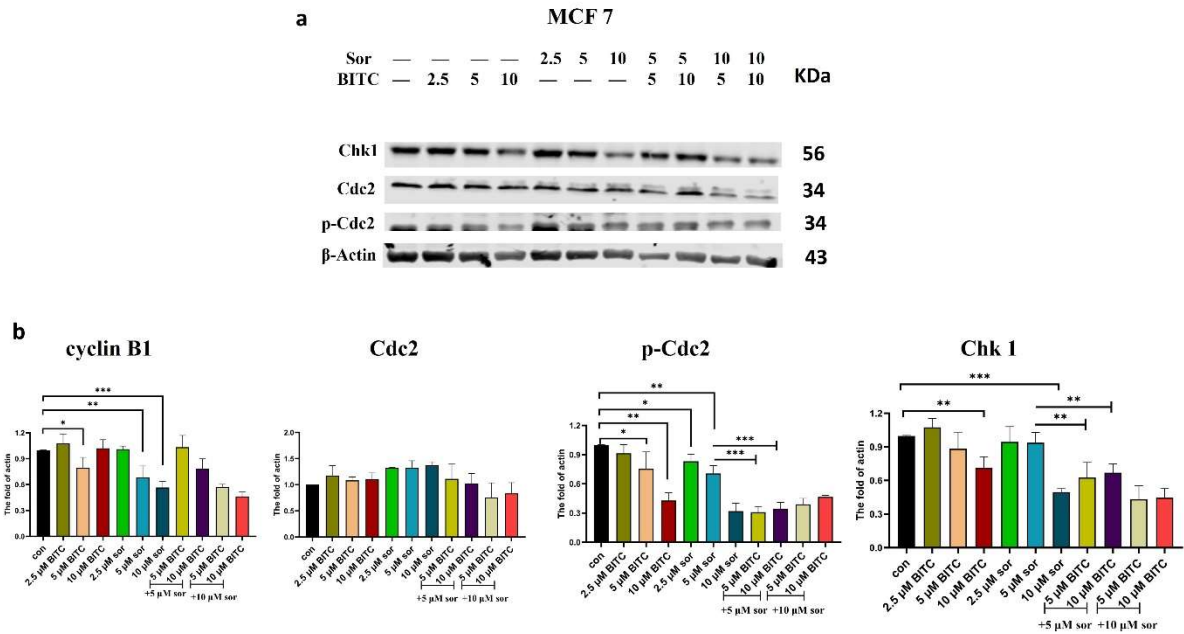

Figure S4. Effects of BITC and SOR treatment on G2 phase protein expression in MCF-7 cells. 24 hours after treatment, the expression of cyclin B1, Chk1, Cdc2, and p-Cdc2 proteins was analyzed by Western blot. Expression of  $\beta$ -Actin served as a loading control. Band densities were normalized against  $\beta$ -actin, and results were expressed as fold changes relative to controls. Data are presented as means  $\pm$  SD (n = 3). \*P < 0.05, \*\*P < 0.01.

### PLGA BITC/Sorafenib NP stability in solution-size

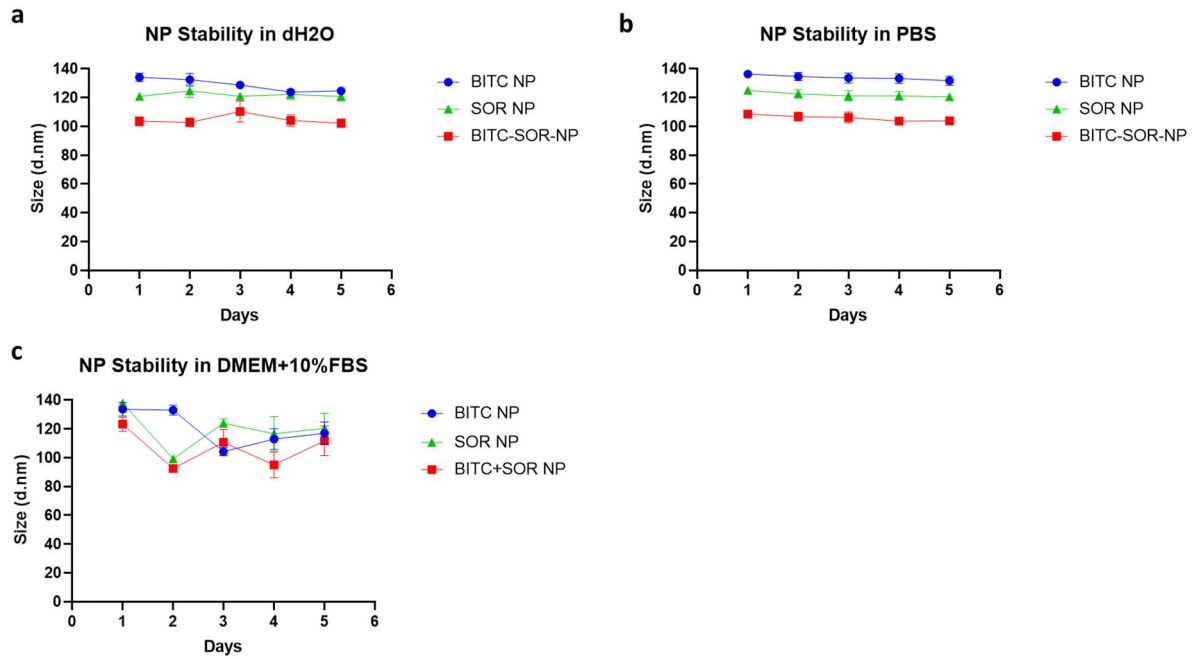

Figure S5. BITC and SOR encapsulated nanoparticle size stability in various solutions. (a) dH<sub>2</sub>O, (b) PBS, (c) DMEM+10%FBS. The size of nanoparticles was measured by dynamic light scattering.

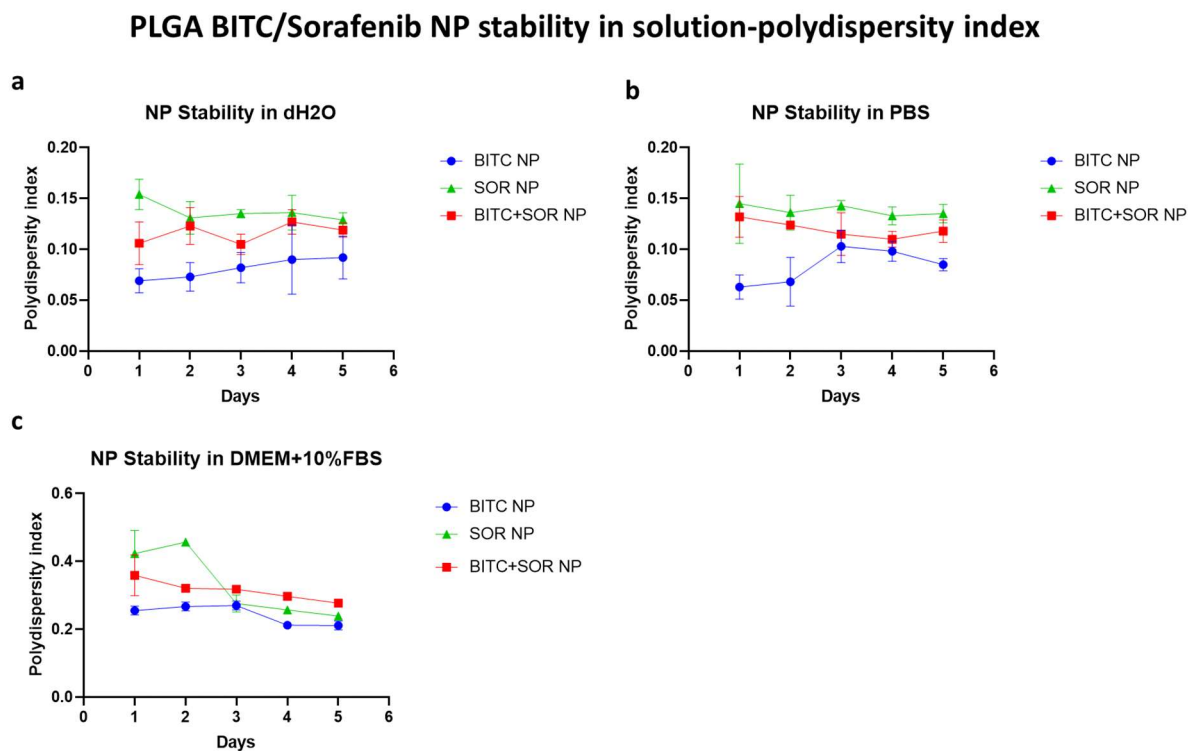

Figure S6. BITC and SOR encapsulated nanoparticle Polydispersity index (PDI) stability in various solutions. (a) dH<sub>2</sub>O, (b) PBS, (c) DMEM+10%FBS. The PDI of nanoparticles was measured by dynamic light scattering.

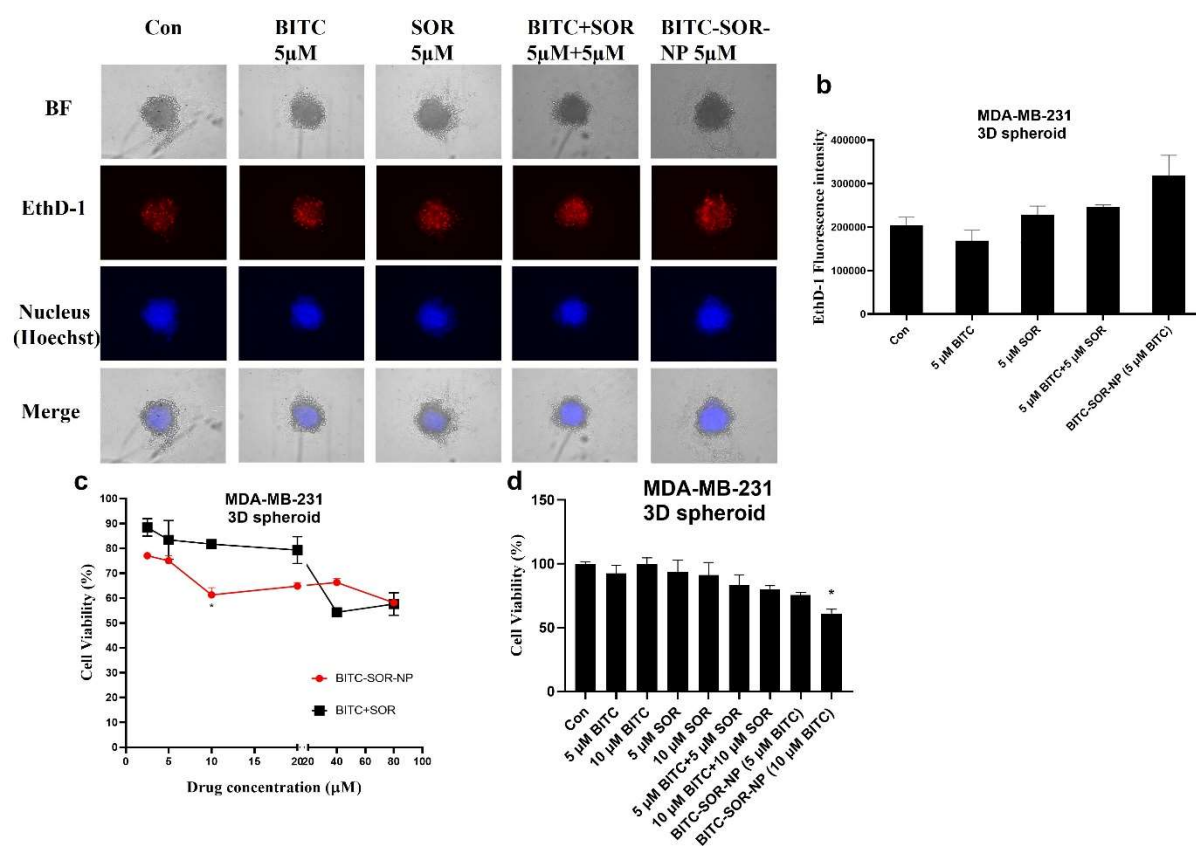

Figure S7. Effects of BITC-SOR-NPs treatment on 3D spheroid of MDA-MB-231 spheroids.

(a) Cytotoxicity of MDA-MB-231 spheroids after BITC and/or SOR free drugs or encapsulated NP treatments for 4 days. Representative images of MDA-MB-231 spheroids were captured using EVOS M5000 microscope under 10x magnification brightfield image, nuclear (blue Hoechst dye staining) and dead (red EthD-1 dye staining) cell population. (b) Fluorescence intensity of EthD-1 dye staining on MDA-MB-231 spheroids after BITC and/or SOR treatments. (c) and (d) Cell viability study of MDA-MB-231 spheroids after 48h treatments of BITC-SOR-NPs and free drug combination. Data are presented as means  $\pm$  SD ( $n = 3$ ). \* $P < 0.05$ .



Table S1: Table of PLGA BITC/Sorafenib NP characteristics

|                         | Size<br>(d.nm) | Polydispersity<br>Index (Pdl) | BITC<br>Encapsulation<br>efficiency (BITC-<br>EE%) | Sorafenib<br>Encapsulation<br>efficiency (Sor-<br>EE%) | Zeta<br>potential<br>(mV) |
|-------------------------|----------------|-------------------------------|----------------------------------------------------|--------------------------------------------------------|---------------------------|
| <b>BITC NP</b>          | 136.3±1.4      | 0.063±0.012                   | 66.2±6.0                                           | NA                                                     | -12.0±0.4                 |
| <b>SOR NP</b>           | 125.0±0.8      | 0.145±0.039                   | NA                                                 | 42.6±2.1                                               | -12.1±0.1                 |
| <b>BITC-SOR-<br/>NP</b> | 108.6±1.9      | 0.132±0.020                   | 24.0±1.5                                           | 38.4±6.3                                               | -7.6±0.3                  |
| <b>ENP<sup>+</sup></b>  | 93.8±0.7       | 0.137±0.036                   | NA                                                 | NA                                                     | -5.0±0.7                  |

+ ENP: empty NP without drug encapsulation
