# Supplementary material for: Synergistic Action of Benzyl Isothiocyanate and Sorafenib in a Nanoparticle Delivery System for Enhanced Triple-Negative Breast Cancer Treatment
Source: MDPI journal article supplement (doi:10.3390/cancers16091695), 2024-04-26
Supplement: s1 [file s1]

MDA-MB-231

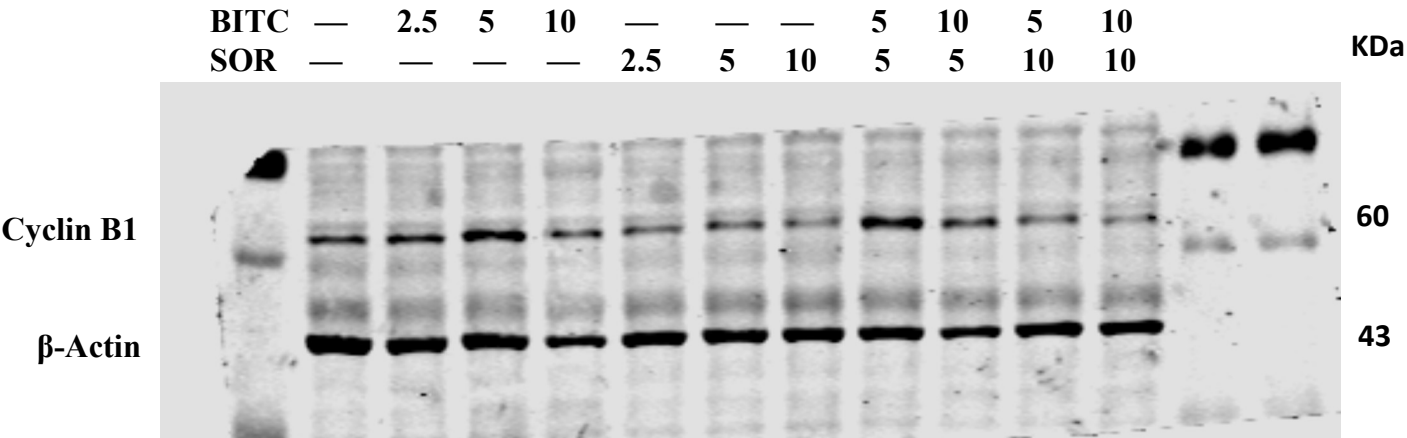

MDA-MB-231

|      |   |     |   |    |     |   |    |   |    |    |    |
|------|---|-----|---|----|-----|---|----|---|----|----|----|
| BITC | — | 2.5 | 5 | 10 | —   | — | —  | 5 | 10 | 5  | 10 |
| SOR  | — | —   | — | —  | 2.5 | 5 | 10 | 5 | 5  | 10 | 10 |

KDa

Chk1  
 $\beta$ -Actin

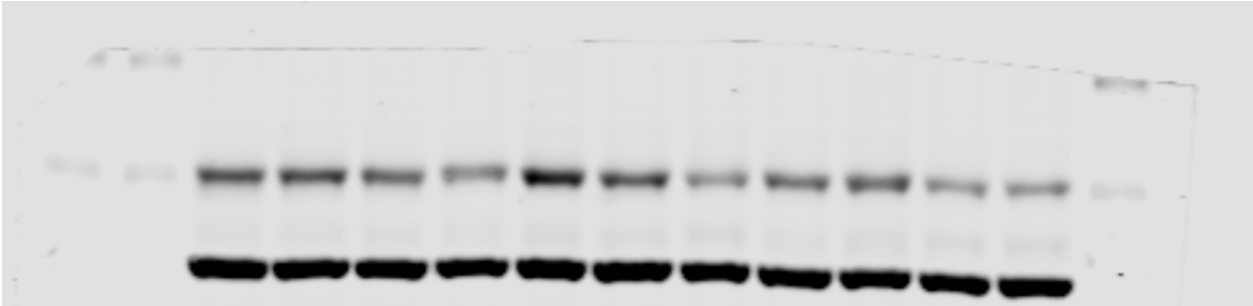

56  
43

MDA-MB-231

|      |   |     |   |    |     |   |    |   |    |    |    |     |
|------|---|-----|---|----|-----|---|----|---|----|----|----|-----|
| BITC | — | 2.5 | 5 | 10 | —   | — | —  | 5 | 10 | 5  | 10 |     |
| SOR  | — | —   | — | —  | 2.5 | 5 | 10 | 5 | 5  | 10 | 10 | KDa |

$\beta$ -Actin

43

Cdc2

34

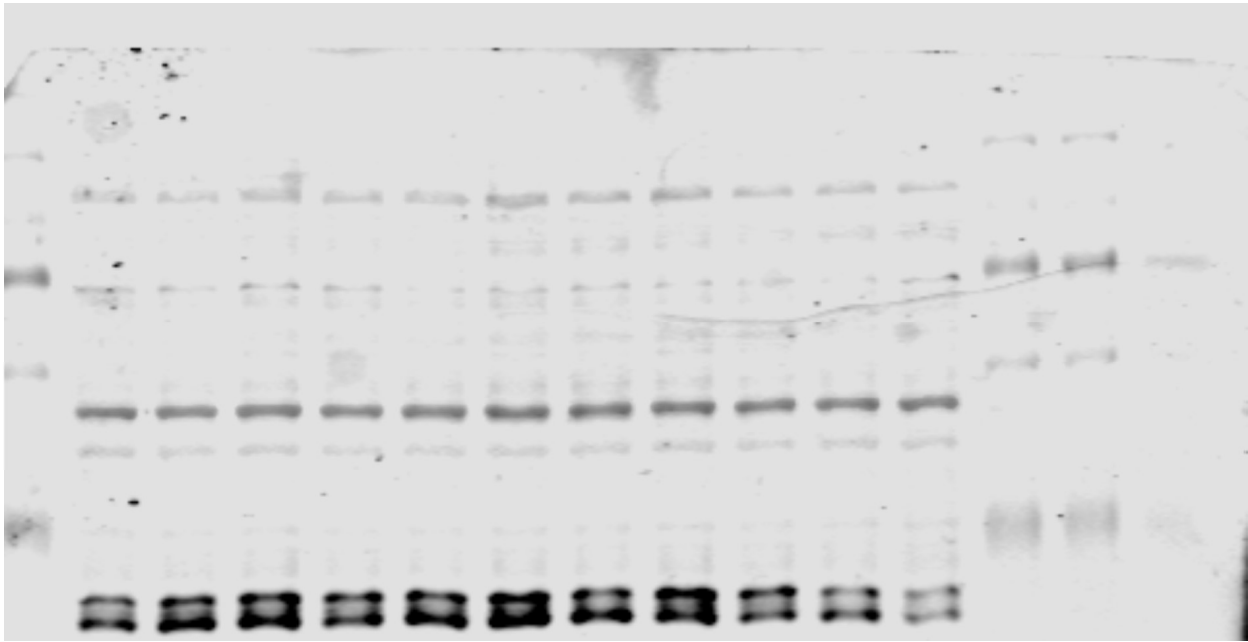

MDA-MB-231

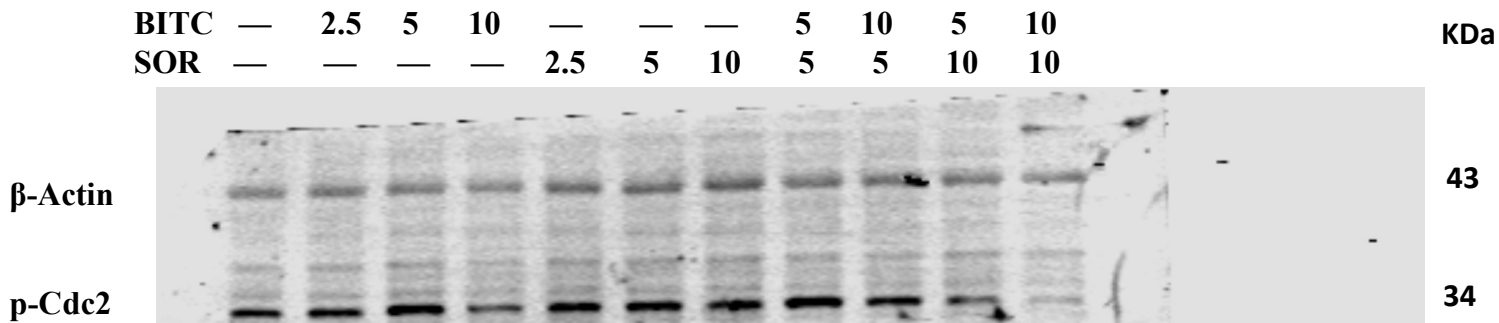

MCF 7

|      |   |     |   |    |     |   |    |   |    |    |    |     |
|------|---|-----|---|----|-----|---|----|---|----|----|----|-----|
| BITC | — | 2.5 | 5 | 10 | —   | — | —  | 5 | 10 | 5  | 10 |     |
| SOR  | — | —   | — | —  | 2.5 | 5 | 10 | 5 | 5  | 10 | 10 | KDa |

Cyclin B1

β-Actin

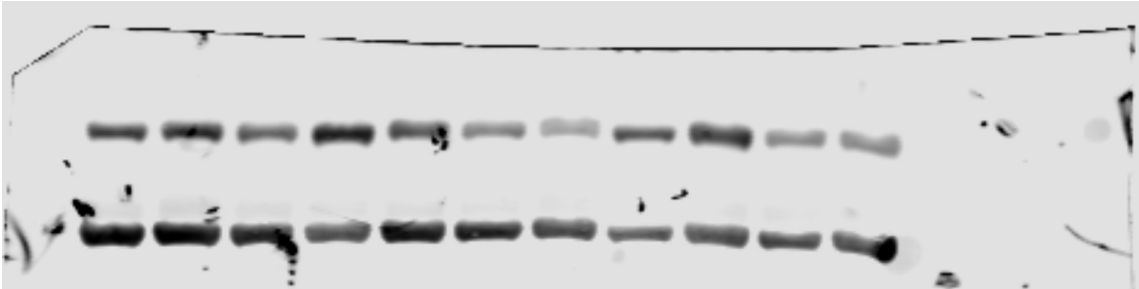

MCF 7

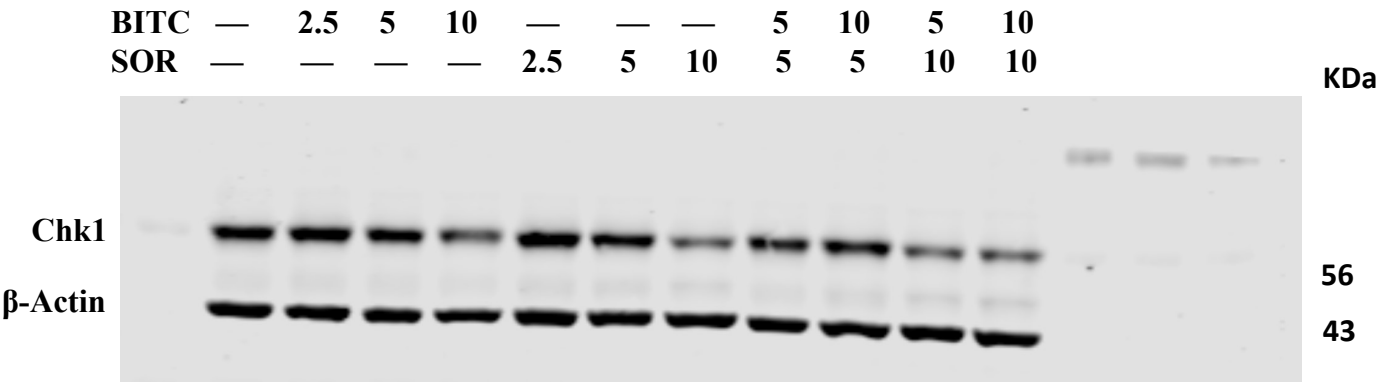

MCF 7

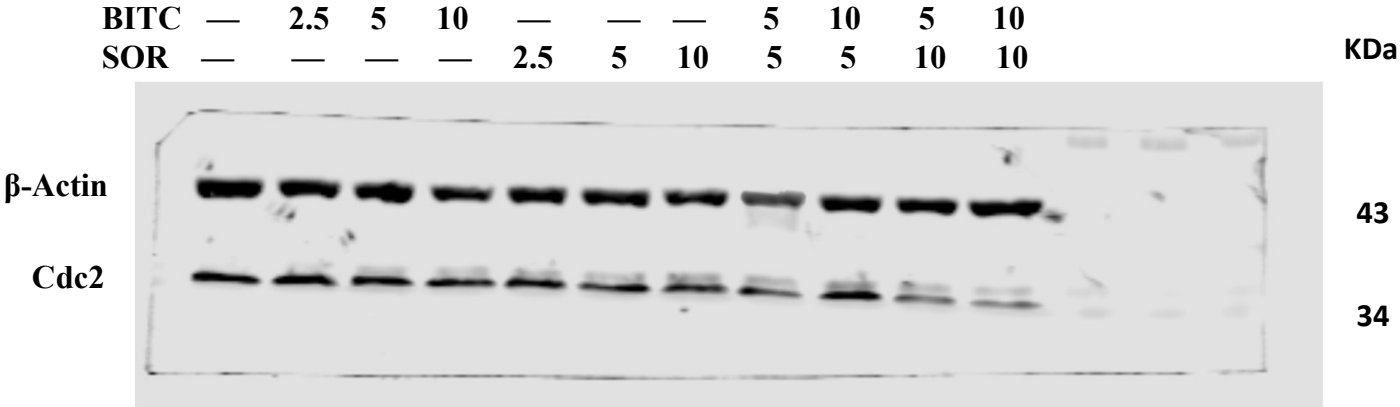

MCF 7

|      |   |     |   |    |     |   |    |   |    |    |    |
|------|---|-----|---|----|-----|---|----|---|----|----|----|
| BITC | — | 2.5 | 5 | 10 | —   | — | —  | 5 | 10 | 5  | 10 |
| SOR  | — | —   | — | —  | 2.5 | 5 | 10 | 5 | 5  | 10 | 10 |

$\beta$ -Actin

p-Cdc2

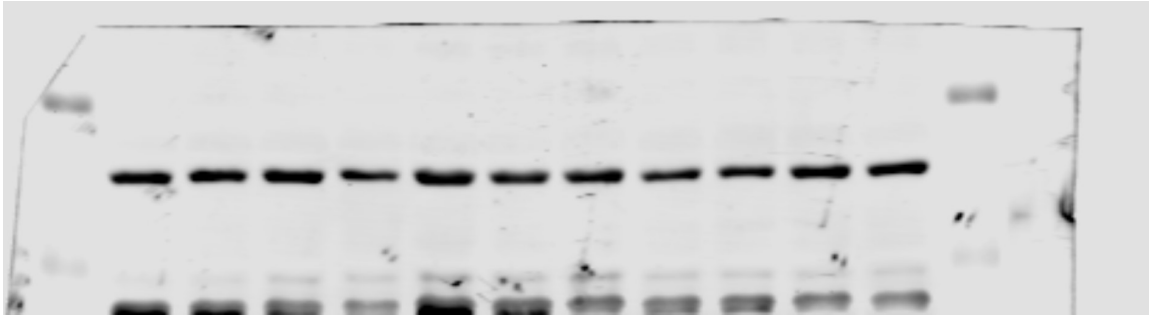

KDa

43

34
